# Supplementary material for: Theoretical insights into volatile iodine adsorption onto COF-DL229
Source: Royal Society of Chemistry journal article supplement (doi:10.1039/d1cp04390k), 2021-01-01
Supplement: d1cp04390k1.pdf [file d1cp04390k1.pdf]

*Supporting Information for*

**Theoretical insights into volatile iodine adsorption onto**

**COF-DL229**

Dayin Tong<sup>a</sup>, Yaolin Zhao<sup>a,\*</sup>, Zhongcun Chen<sup>a</sup>, Yuqi Wang<sup>a</sup>, Ziqi Jia<sup>a</sup>, Xiaomeng

Nie<sup>a</sup>, Songtao Xiao<sup>b</sup>

<sup>a</sup>: School of Nuclear Science and Technology, Xi'an Jiaotong University, Xi'an

710049, P. R. China

<sup>b</sup>: China Institute of Atomic Energy, Beijing 102413, P. R. China

\*Corresponding author: zhaoyaolin@mail.xjtu.edu.cn

**Totally 6 pages including 5 Tables, 3 Figures, and 2 Equations.**

**Figure S1.** The  $1\times 1\times 2$  supercell of COF-DL229 with different display settings. (Pages S3)

**Figure S2.** The skeleton structures comparison before and after iodine adsorption. (Pages S4)

**Figure S3.** The corresponding partial structure of the I-N bond at IM site in vertical mode. (Pages S5)

**Table S1.** Adsorption energies and structural parameters of  $I_2$  adsorption onto COF-DL229 while the structure of COF-DL229 was fixed. (Pages S3)

**Table S2.** Total energies of various adsorption sites under the condition of that all atoms are relaxed or the skeletons atoms are fixed. (Pages S3)

**Table S3.** The distances between iodine molecules before and after adsorption onto COF-DL229. (Pages S3)

**Table S4.** The specific data of deformation energies, interaction energies, and their contributions to adsorption energies of each site in different modes. (Pages S5)

**Table S5.** The energies of HOMO, LUMO, and Energy Gap corresponding to the clean COF-DL229 and different adsorption configurations. (Pages S5)

**Equations.** The computational equations of COHP and ICOHP. (Pages S6)

**References.** (Pages S6)

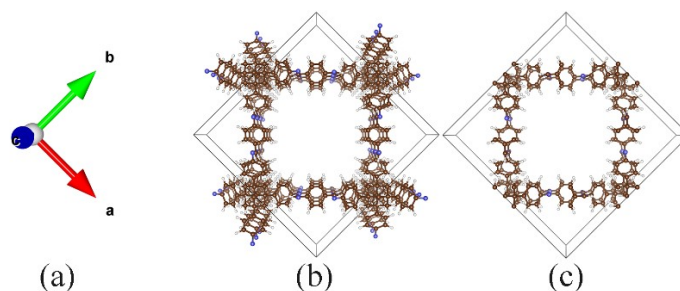

**Fig. S1** The  $1 \times 1 \times 2$  supercell with boundary line displayed with attached atoms near the boundary (b) and without atoms beyond boundary (c). (a) is the coordinate axis. The N, C, and H atoms are shown in blue, brown, and white, respectively.

**Table S1** Adsorption energies ( $E_{\text{ads}}$ , eV) and structural parameters ( $\text{\AA}$ ) of  $\text{I}_2$  adsorption onto COF-DL229. COF-DL229 was fixed.

|    | Site     | $E_{\text{ads}}$ | $E_{\text{disp}}$ | $\Delta d$ | I-I  | I-N  | I-C       |
|----|----------|------------------|-------------------|------------|------|------|-----------|
| IM | vertical | -0.55            | -0.40             | 0          | 2.74 | 2.91 |           |
|    | parallel | -0.55            | -0.40             | 0          | 2.74 | 2.89 |           |
| PH | vertical | -0.56            | -0.41             | 0          | 2.74 | 2.90 |           |
|    | parallel | -0.55            | -0.40             | 0          | 2.74 | 2.89 |           |
| CO | vertical | -0.46            | -0.41             | 0          | 2.70 |      | 3.32/3.72 |
|    | parallel | -0.37            | -0.40             | 0          | 2.68 |      | 3.98/4.11 |

**Table S2** Total energies ( $E_{\text{tot}}$ , eV) and adsorption energies ( $E_{\text{ads}}$ , eV) of various adsorption sites under the condition of that all atoms are relaxed or the skeletons atoms are fixed.

| Site |          | All atoms are relaxed |                             | Skeleton atoms are fixed |                             |
|------|----------|-----------------------|-----------------------------|--------------------------|-----------------------------|
|      |          | $E_{\text{tot}}$      | $E_{\text{ads}}^{\text{a}}$ | $E_{\text{tot}}$         | $E_{\text{ads}}^{\text{a}}$ |
| IM   | vertical | -2534.38              | -8.75                       | -2526.18                 | -0.55                       |
|      | parallel | -2534.01              | -8.38                       | -2526.18                 | -0.55                       |
| PH   | vertical | -2534.38              | -8.75                       | -2526.19                 | -0.56                       |
|      | parallel | -2534.53              | -8.90                       | -2526.18                 | -0.55                       |
| CO   | vertical | -2534.89              | -9.26                       | -2526.09                 | -0.46                       |
|      | parallel | -2534.67              | -9.04                       | -2526.00                 | -0.37                       |

<sup>a</sup>: the total energies of clean COF-DL229 and  $\text{I}_2$  molecule are -2522.97 and -2.66 eV, respectively.

**Table S3** The distances ( $\text{\AA}$ ) between  $\text{I}_2$  molecules before and after adsorption onto COF-DL229.

|    | Site     | $\text{I}_2$ distance (before) | $\text{I}_2$ distance (after) |
|----|----------|--------------------------------|-------------------------------|
| IM | vertical | 14.85                          | 13.76                         |
|    | parallel | 14.00                          | 13.86                         |
| PH | vertical | 14.85                          | 13.66                         |
|    | parallel | 13.55                          | 14.25                         |
| CO | vertical | 14.85                          | 12.90                         |
|    | parallel | 12.17                          | 13.56                         |

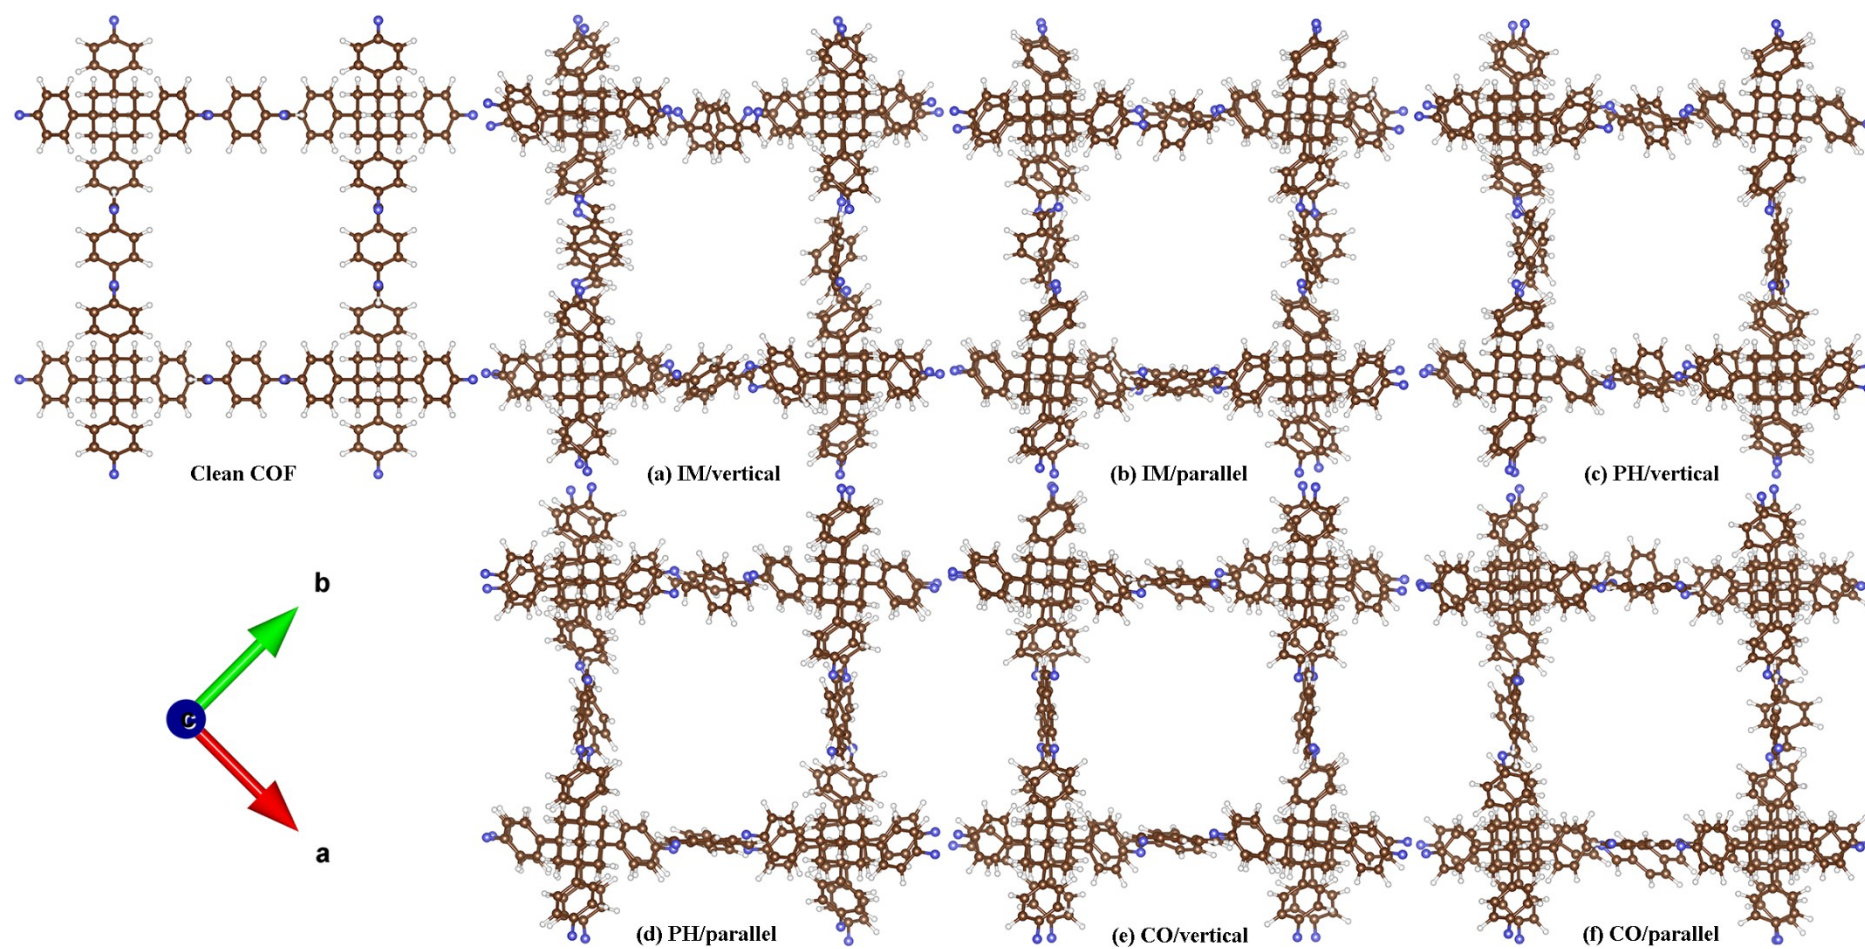

**Fig. S2** The skeleton structures comparison before (Clean COF) and after adsorption (a-f). The N, C, and H atoms are shown in blue, brown, and white, respectively.

**Table S4** The specific data of deformation energies, interaction energies, and their contributions to adsorption energies of each site in different modes.

|    | Site     | $E_{\text{ads}}$ | $E_{\text{def}}(\text{COF})^{\text{a}}$ | $E_{\text{def}}(\text{I}_2)^{\text{a}}$ | $E_{\text{int}}(\text{I}_2/\text{COF})^{\text{a}}$ |
|----|----------|------------------|-----------------------------------------|-----------------------------------------|----------------------------------------------------|
| IM | vertical | -8.75            | -7.91/90.40%                            | 0.04/-0.46%                             | -0.88/10.06%                                       |
|    | parallel | -8.38            | -7.94/94.75%                            | 0.00/0.00%                              | -0.44/5.25%                                        |
| PH | vertical | -8.75            | -7.94/90.74%                            | 0.04/-0.46%                             | -0.85/9.71%                                        |
|    | parallel | -8.90            | -8.29/93.15%                            | 0.01/-0.11%                             | -0.62/6.97%                                        |
| CO | vertical | -9.26            | -8.69/93.84%                            | 0.01/-0.11%                             | -0.58/6.26%                                        |
|    | parallel | -9.04            | -8.15/90.15%                            | 0.02/-0.22%                             | -0.91/10.07%                                       |

<sup>a</sup>: The X of X/Y denotes the energy, whereas the Y denotes the percentage contributed to adsorption energy.

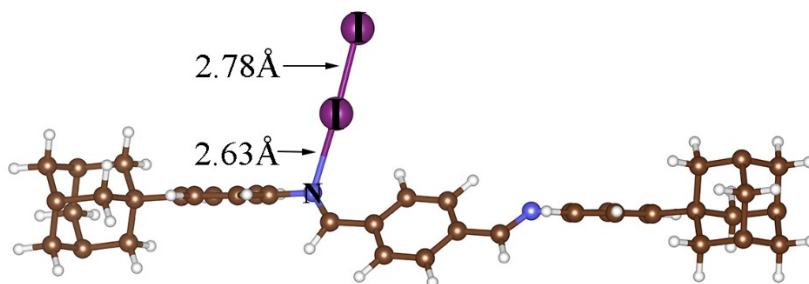

**Fig. S3** The corresponding partial structure of the I-N bond at IM site in vertical mode. The N, C, H, and I atoms are shown in blue, brown, white, and purple, respectively.

**Table S5** The energies of HOMO, LUMO, and Energy Gap corresponding to the clean COF-DL229 and different adsorption configurations. The unit is eV.

| Configuration           | $E(\text{HOMO})$ | $E(\text{LUMO})$ | $E_{\text{gap}}$ |
|-------------------------|------------------|------------------|------------------|
| COF-DL229               | -0.58            | 2.68             | 3.26             |
| $\text{I}_2@ \text{IM}$ | -0.54            | 1.17             | 1.71             |
| $\text{I}_2@ \text{PH}$ | -0.58            | 0.77             | 1.35             |
| $\text{I}_2@ \text{CO}$ | -0.67            | 0.84             | 1.51             |

## Equations

The integrated crystal orbital Hamilton population (ICOHP) is calculated by the energy integral up to the highest occupied bands. The specific computational equation of ICOHP is given below [1].

$$\text{COHP}_{\mu\nu}(E, \mathbf{k}) = \sum_j R[P_{\mu\nu}^{(proj)}(k)H_{\nu\mu}^{(proj)}(k)] \times \delta(\varepsilon_j(k) - E)$$

$$\text{ICOHP}(\varepsilon_F) = \int^{\varepsilon_F} \text{COHP}(E) \, dE$$

## References

- [1] V.L. Deringer, A.L. Tchougréeff, R. Dronskowski, Crystal Orbital Hamilton Population (COHP) Analysis As Projected from Plane-Wave Basis Sets, The Journal of Physical Chemistry A 115 (2011) 5461-5466.
